# Supplementary material for: Constituents of Amoora cucullata with TRAIL resistance-overcoming activity
Source: Royal Society of Chemistry journal article supplement (doi:10.1039/c004927a), 2010-01-01

## Electronic Supplementary Information

Constituents of *Amoora cucullata* with TRAIL resistance overcoming activity

Firoj Ahmeda, Kazufumi Toume, Samir K. Sadhu, Takashi Ohtsuki, Midori A. Arai, and Masami Ishibashi\*

**(ESI1)** <sup>1</sup>H and <sup>13</sup>C spectra of 4 new compounds (**1** – **4**)

**Figure 10 (a)** <sup>1</sup>H NMR spectrum of compound **1** in CDCl<sub>3</sub>

**Figure 10 (b)** <sup>13</sup>C NMR spectrum of compound **1** in CDCl<sub>3</sub>

**Figure 11 (a)** <sup>1</sup>H NMR spectrum of compound **2** in CDCl<sub>3</sub>

**Figure 11 (b)** <sup>13</sup>C NMR spectrum of compound **2** in CDCl<sub>3</sub>

**Figure 12 (a)** <sup>1</sup>H NMR spectrum of compound **3** in CDCl<sub>3</sub>

**Figure 12 (b)** <sup>13</sup>C NMR spectrum of compound **3** in CDCl<sub>3</sub>

**Figure 13 (a)** <sup>1</sup>H NMR spectrum of compound **4** in CDCl<sub>3</sub>

**Figure 13 (b)** <sup>13</sup>C NMR spectrum of compound **4** in CDCl<sub>3</sub>

**Figure 10 (a)**  $^1\text{H}$  NMR spectrum of compound **1** in  $\text{CDCl}_3$

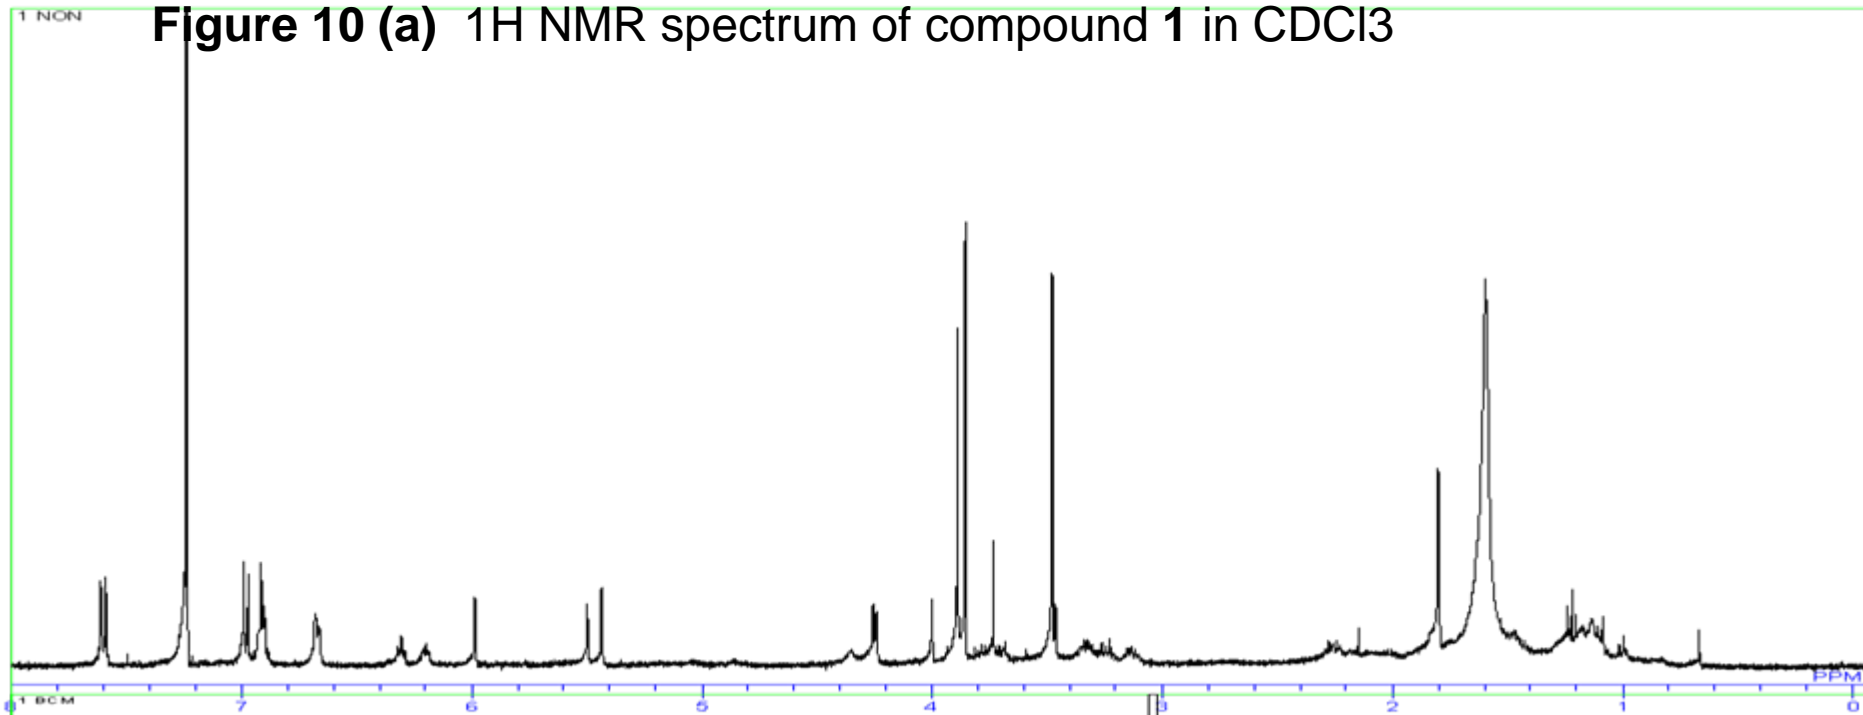

**Figure 10 (b)**  $^{13}\text{C}$  NMR spectrum of compound **1** in  $\text{CDCl}_3$

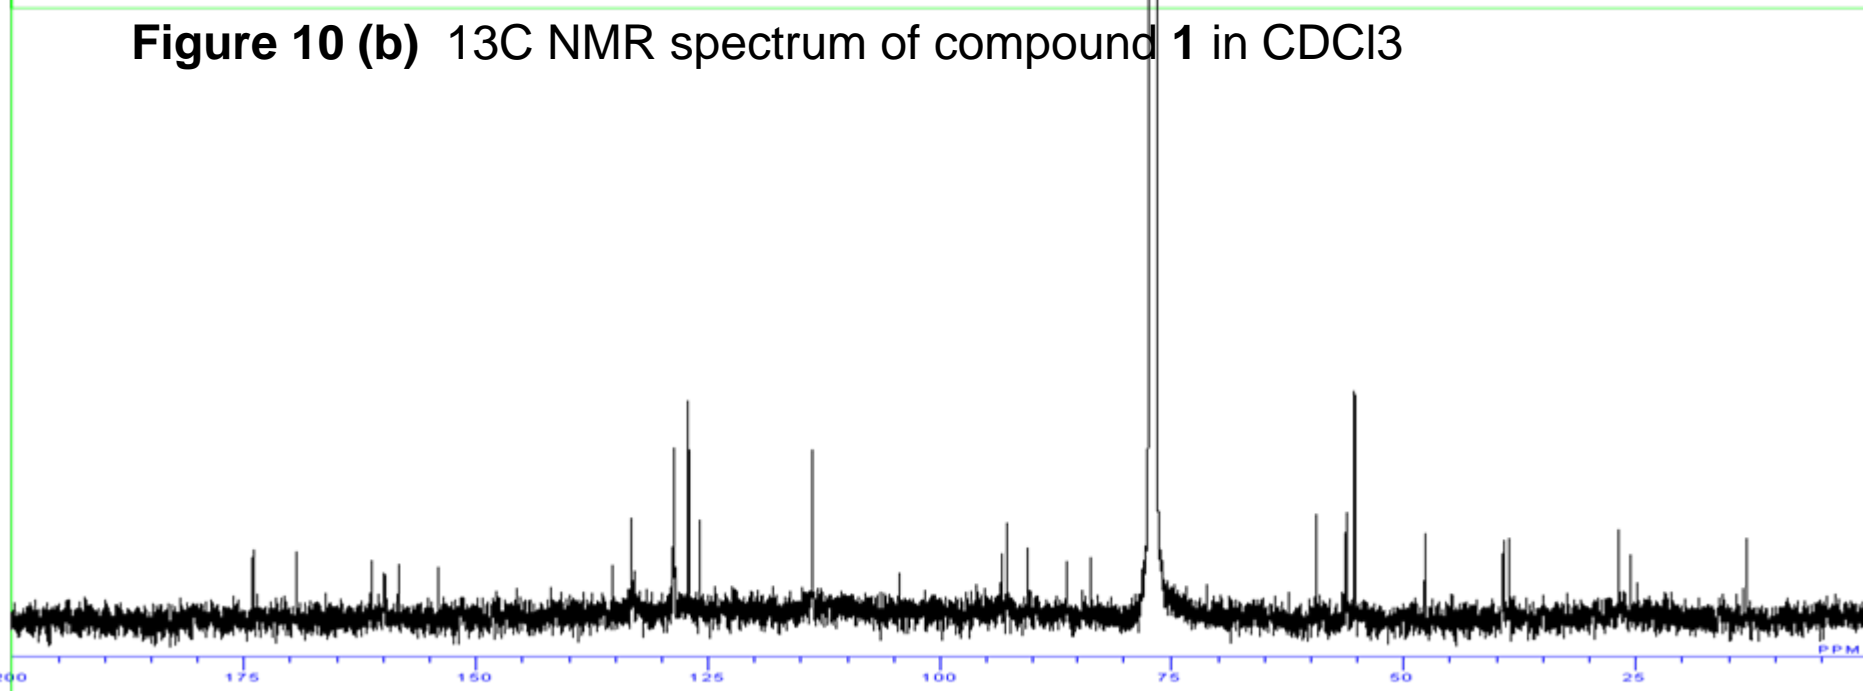

**Figure 11 (a)**  $^1\text{H}$  NMR spectrum of compound **2** in  $\text{CDCl}_3$

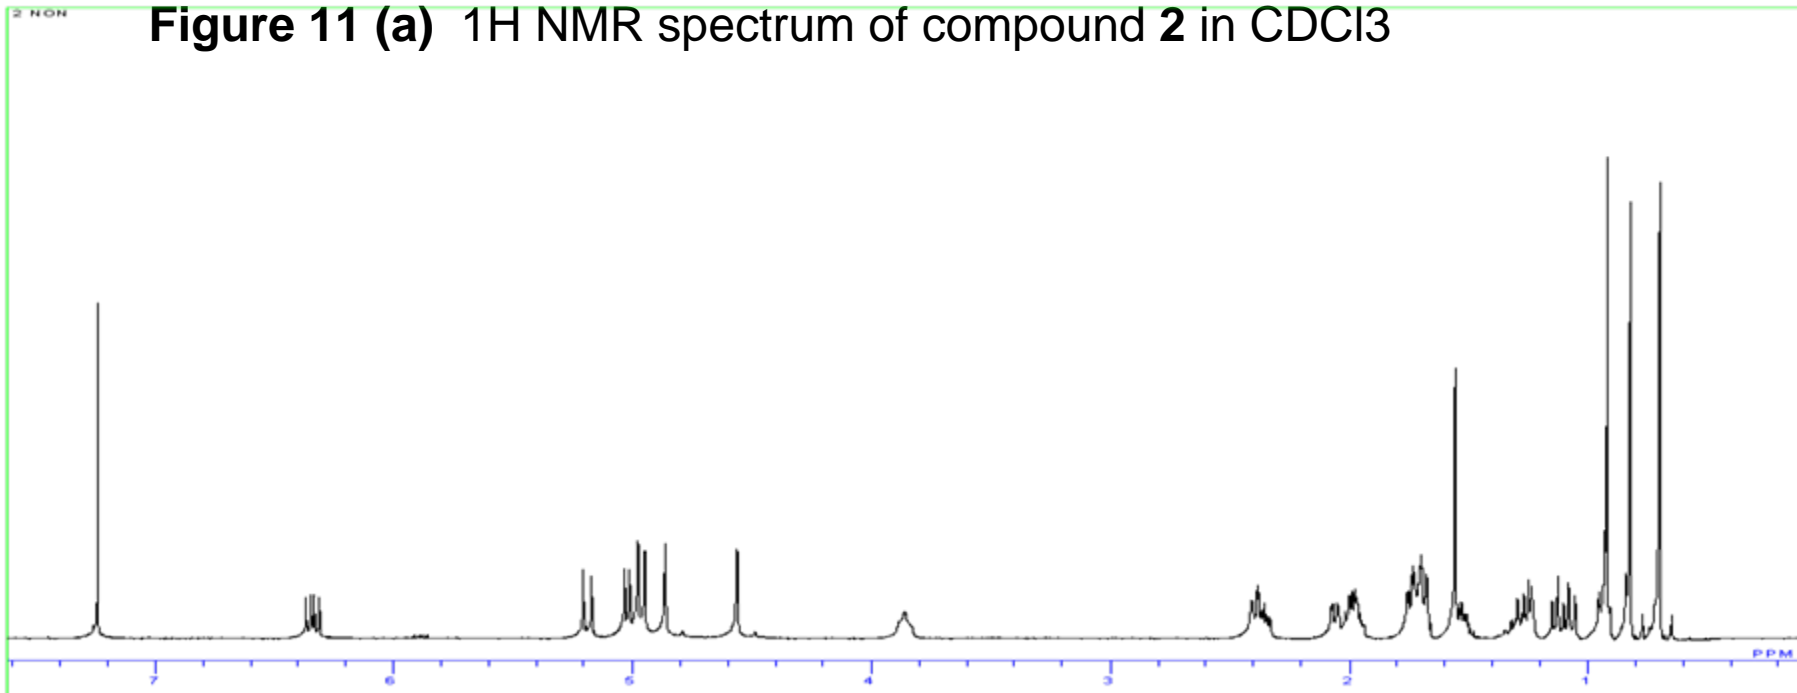

**Figure 11 (b)**  $^{13}\text{C}$  NMR spectrum of compound **2** in  $\text{CDCl}_3$

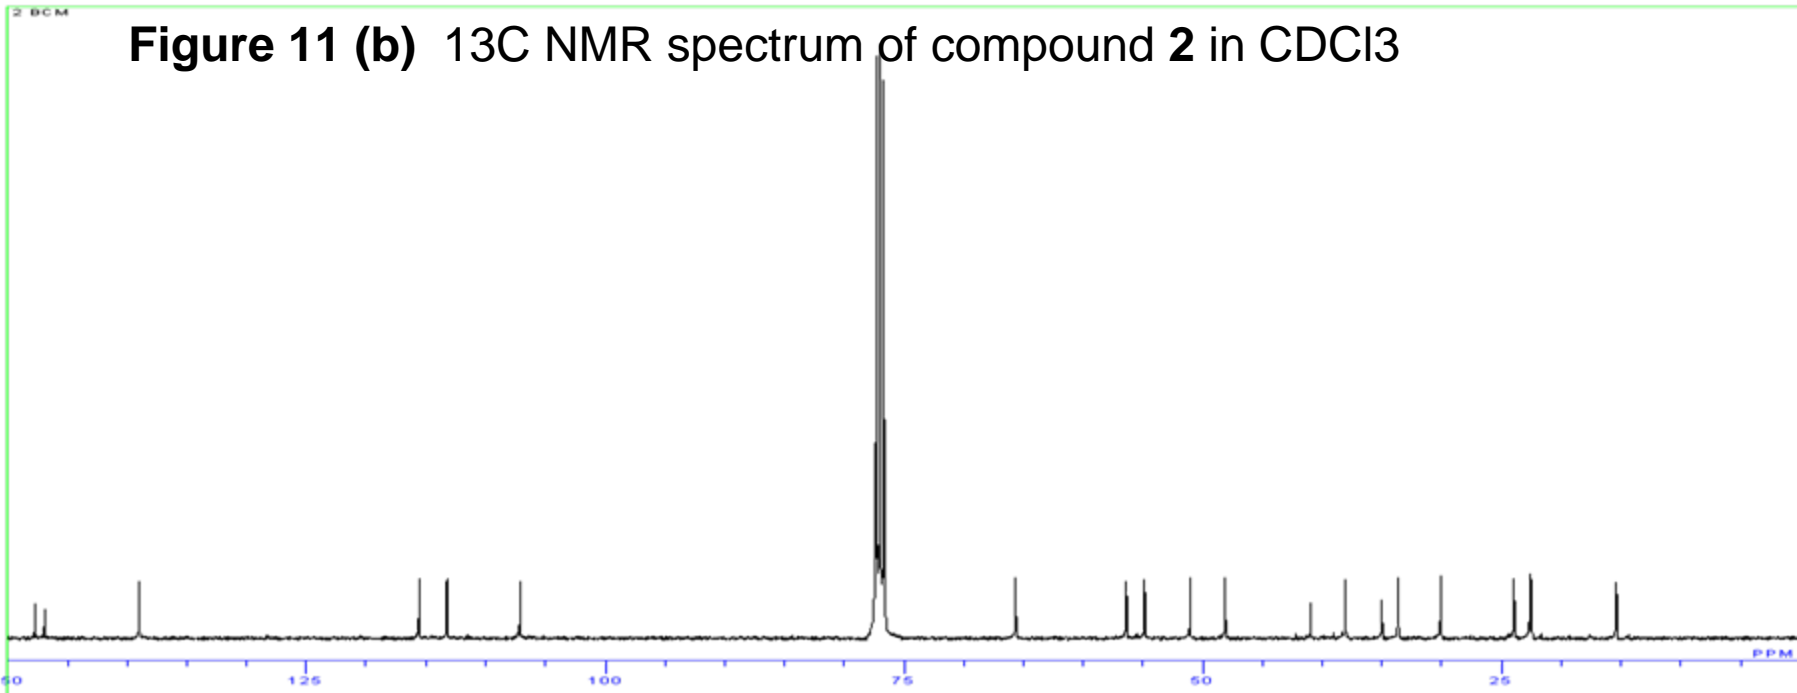

**Figure 12 (a)**  $^1\text{H}$  NMR spectrum of compound **3** in  $\text{CDCl}_3$

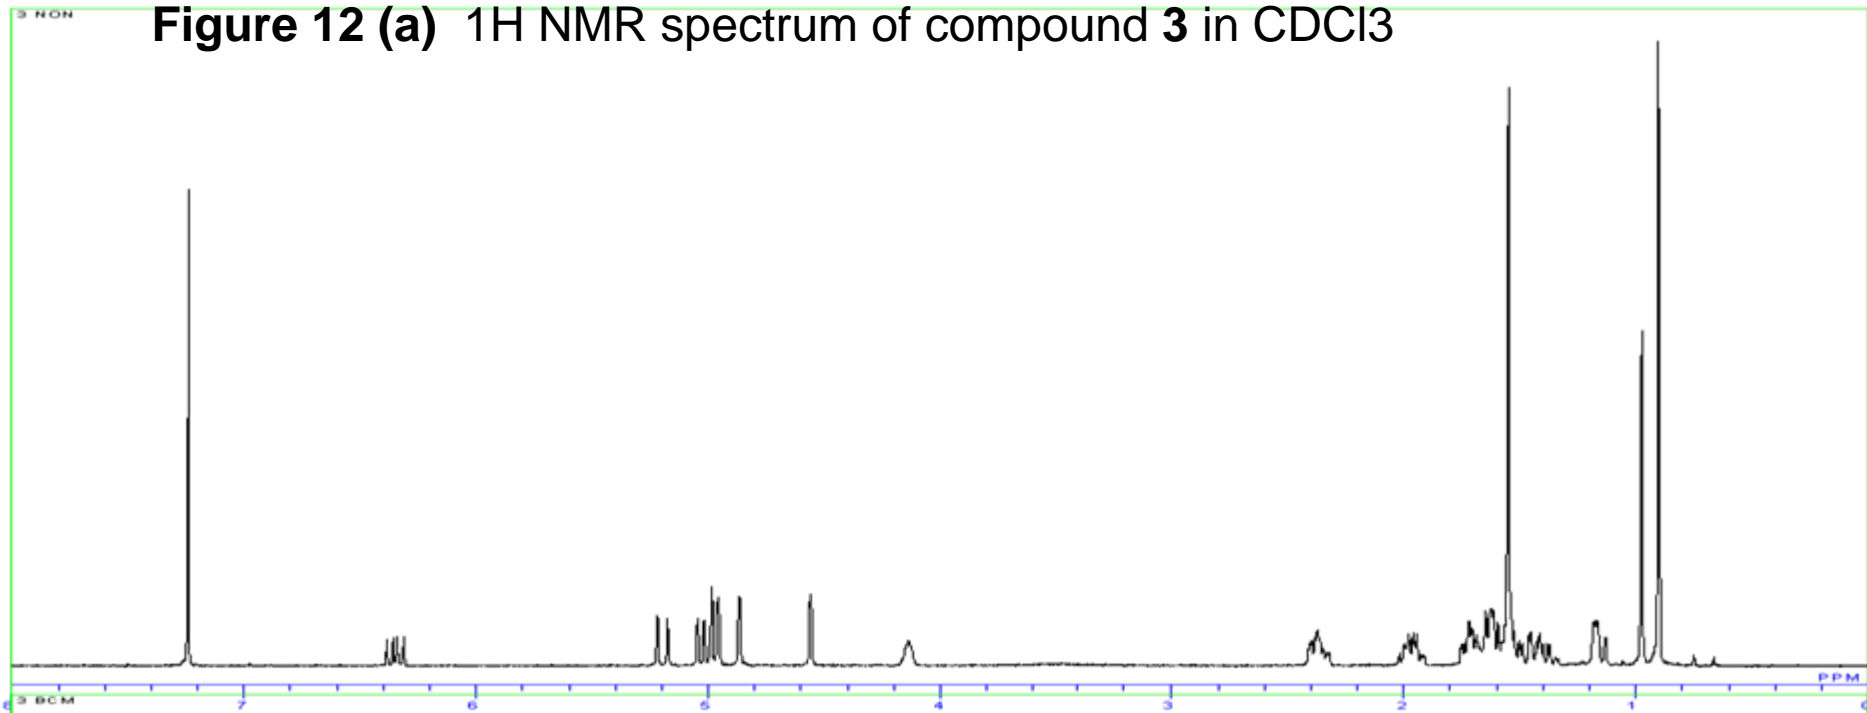

**Figure 12 (b)**  $^{13}\text{C}$  NMR spectrum of compound **3** in  $\text{CDCl}_3$

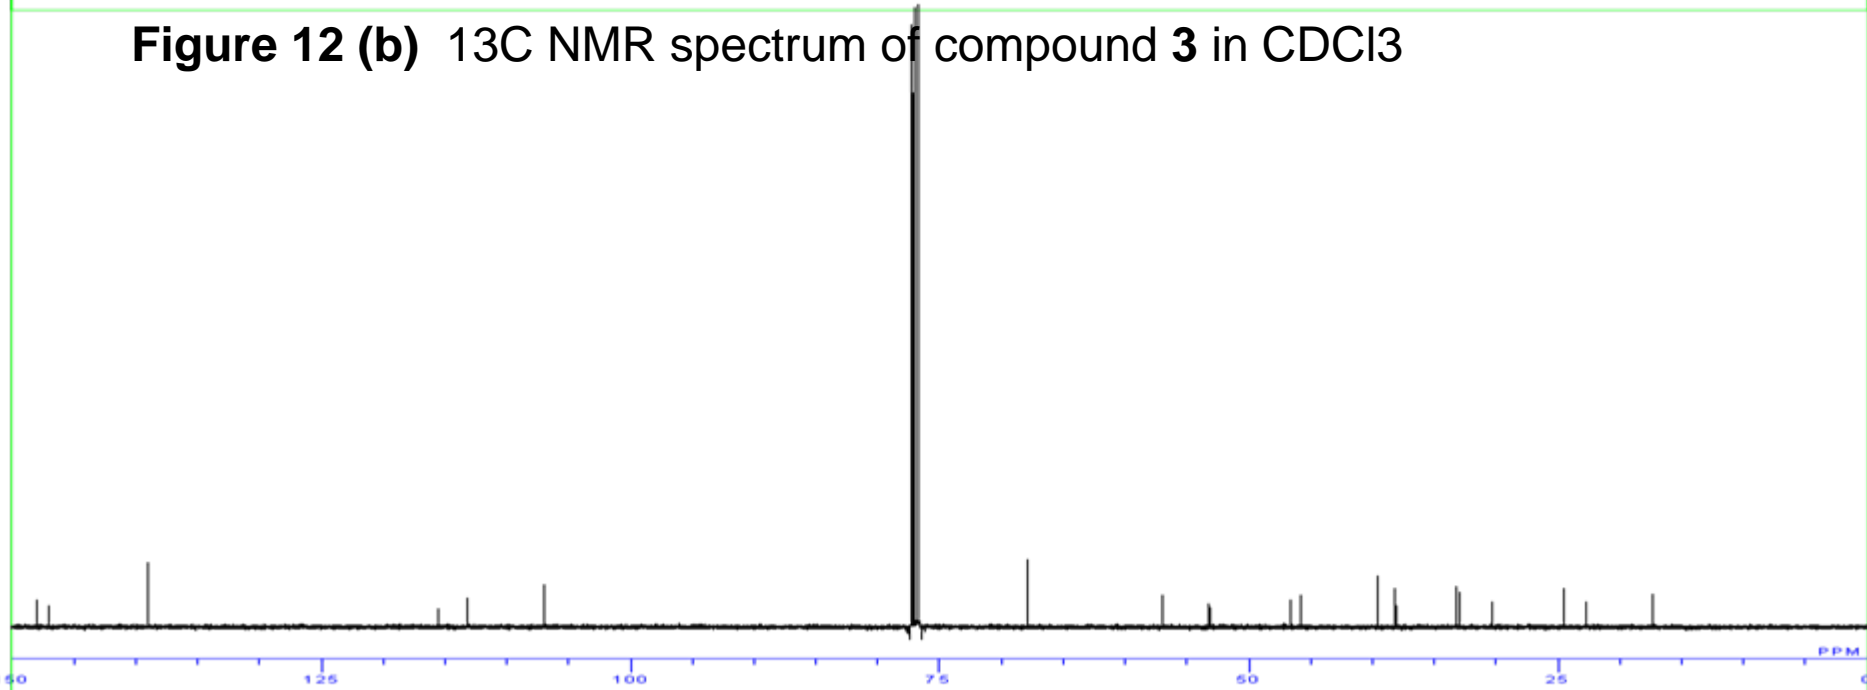

**Figure 13 (a)**  $^1\text{H}$  NMR spectrum of compound **4** in  $\text{CDCl}_3$

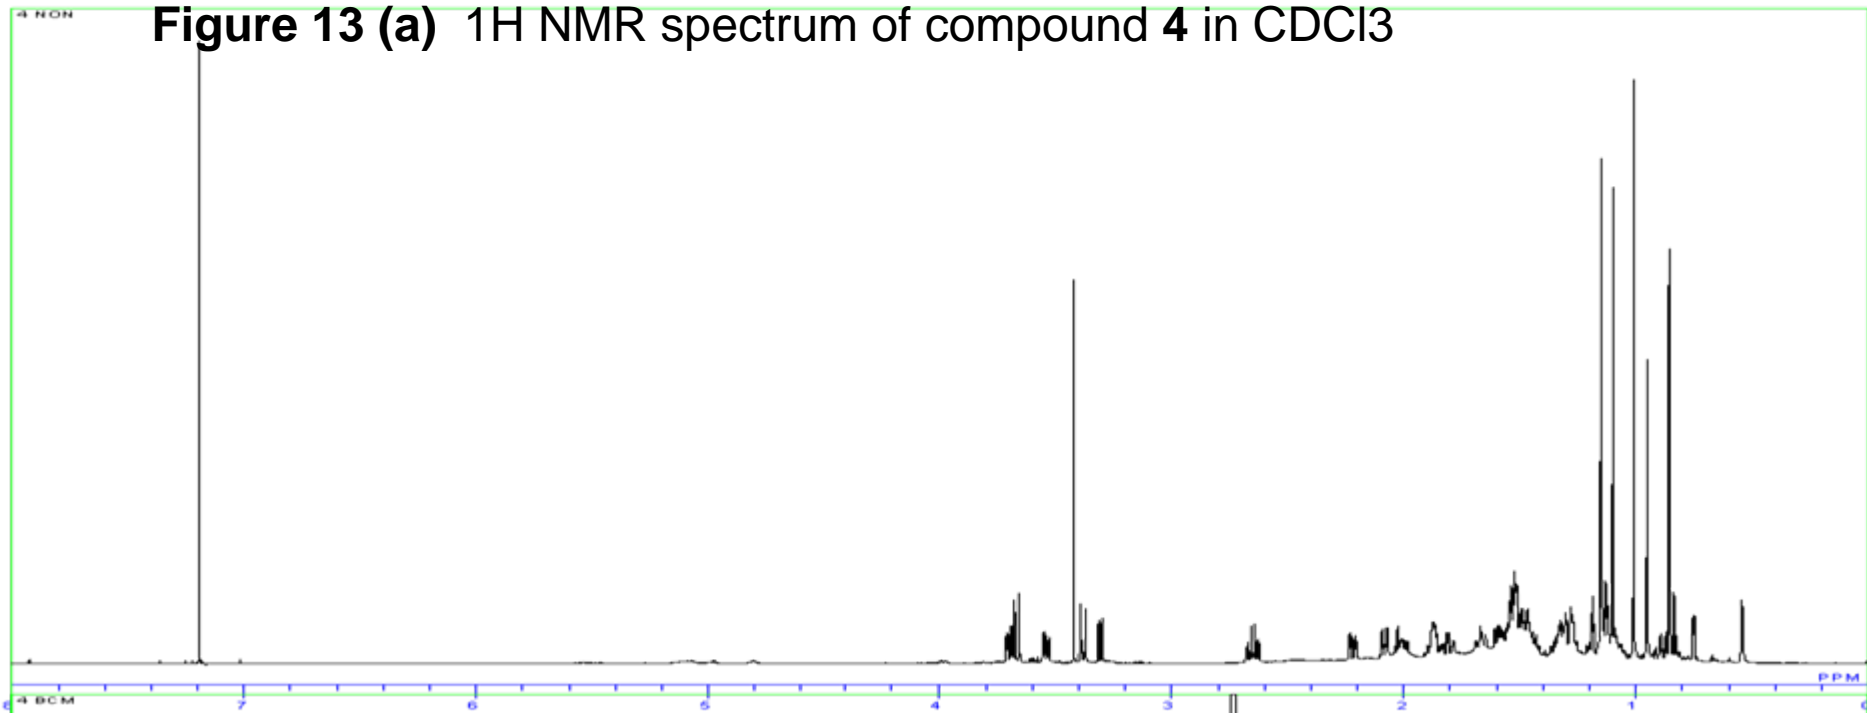

**Figure 13 (b)**  $^{13}\text{C}$  NMR spectrum of compound **4** in  $\text{CDCl}_3$

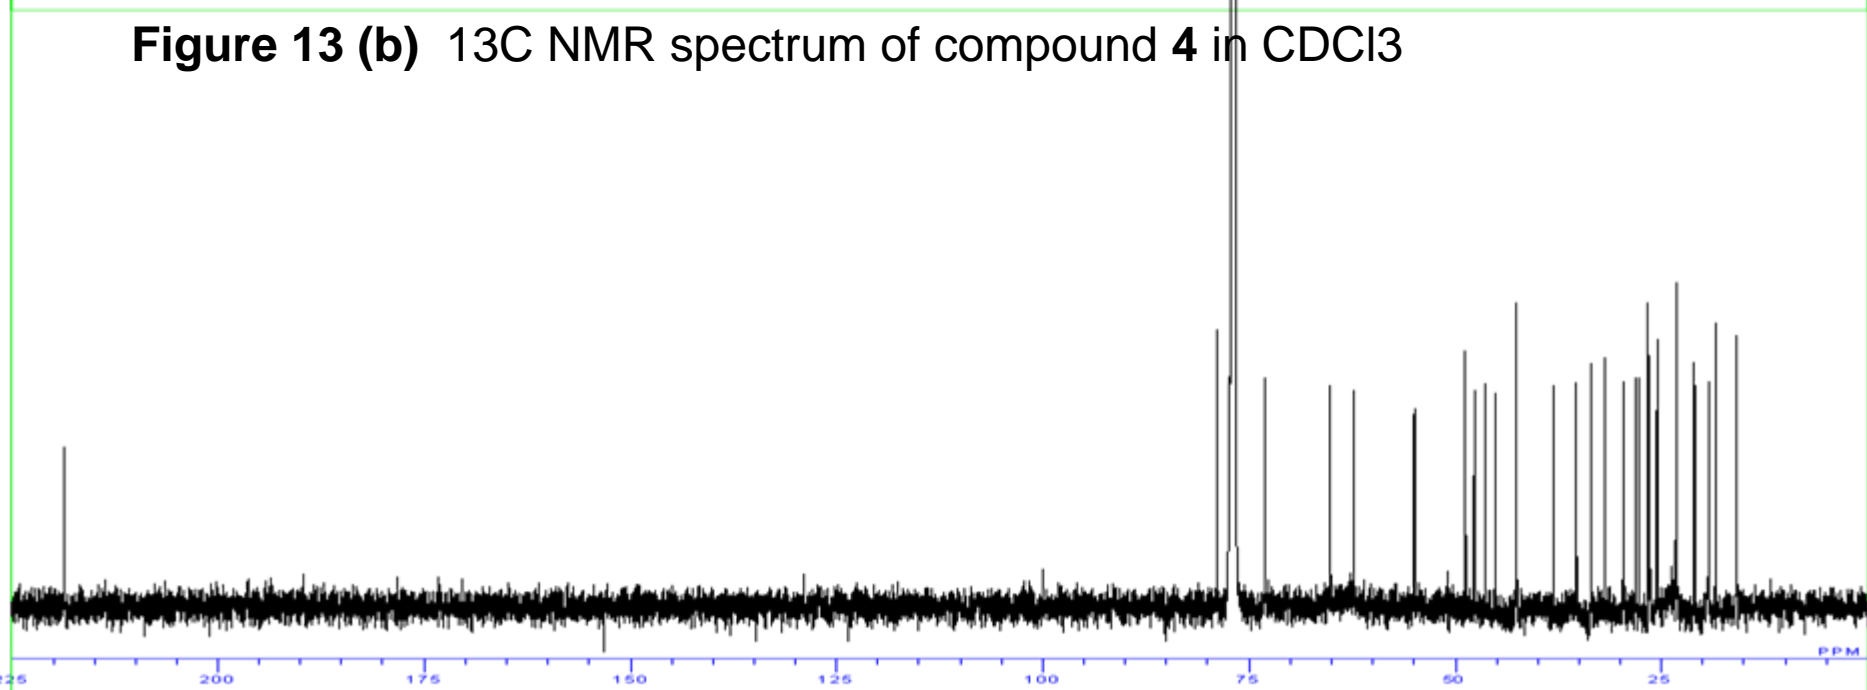

Supplement: c004927a.pdf [file c004927a.pdf]
